# Supplementary material for: Di-piperidinium-crosslinked poly(fluorenyl-co-terphenyl piperidinium)s for high-performance alkaline exchange membrane fuel cells
Source: Royal Society of Chemistry journal article supplement (doi:10.1039/d1ta10178a), 2022-01-01
Supplement: d1ta10178a1.pdf [file d1ta10178a1.pdf]

*Supporting information for*

**Di-piperidinium-crosslinked poly(fluorenyl-co-terphenyl  
piperidinium)s toward high-performance alkaline  
exchange membrane fuel cells**

Nanjun Chen<sup>†</sup>, Jong Hyeong Park<sup>†</sup>, Chuan Hu, Ho Hyun Wang, Hae Min Kim, Na Yoon

Kang, Young Moo Lee\*

Department of Energy Engineering, College of Engineering, Hanyang University, Seoul

04763, Republic of Korea

\*Corresponding author: [ymlee@hanyang.ac.kr](mailto:ymlee@hanyang.ac.kr)

<sup>†</sup>These authors contributed equally to this work.

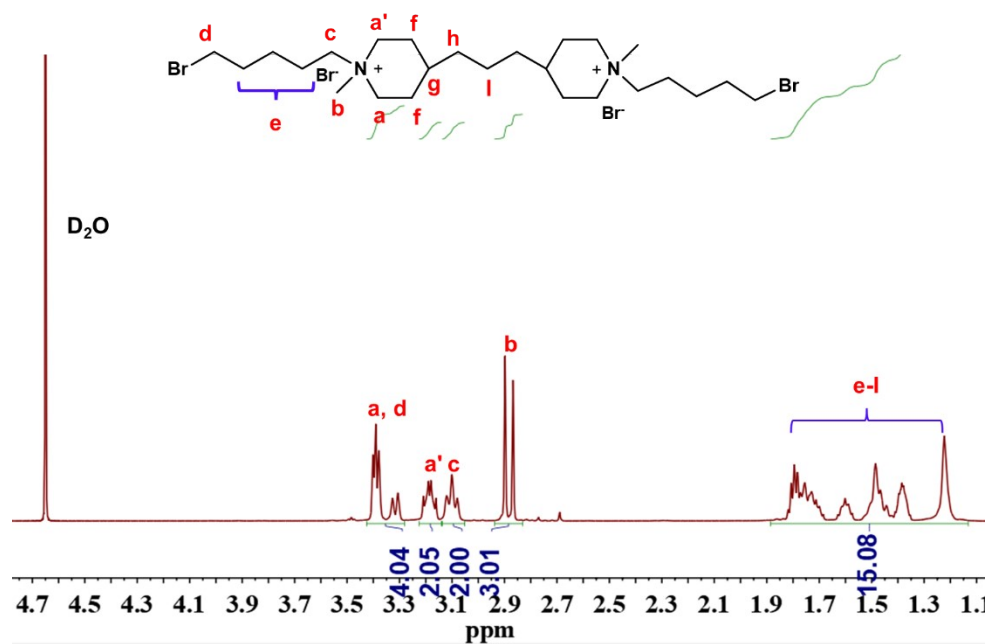

**Figure S1.**  $^1\text{H}$  NMR spectrum and chemical structure of DB-DP-C5.

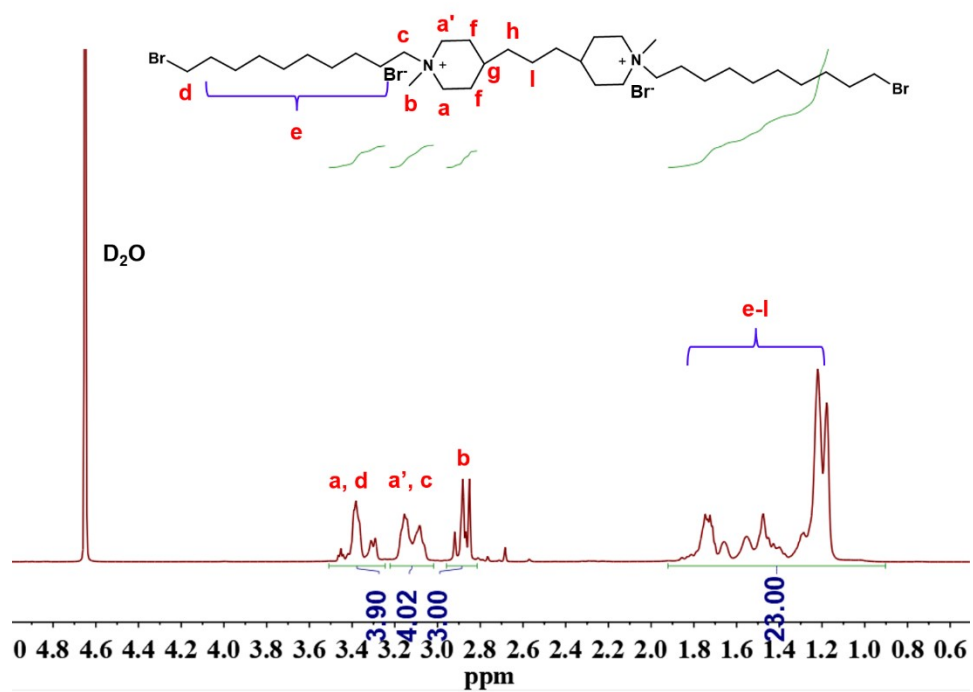

**Figure S2.** <sup>1</sup>H NMR spectrum and chemical structure of DB-DP-C10.

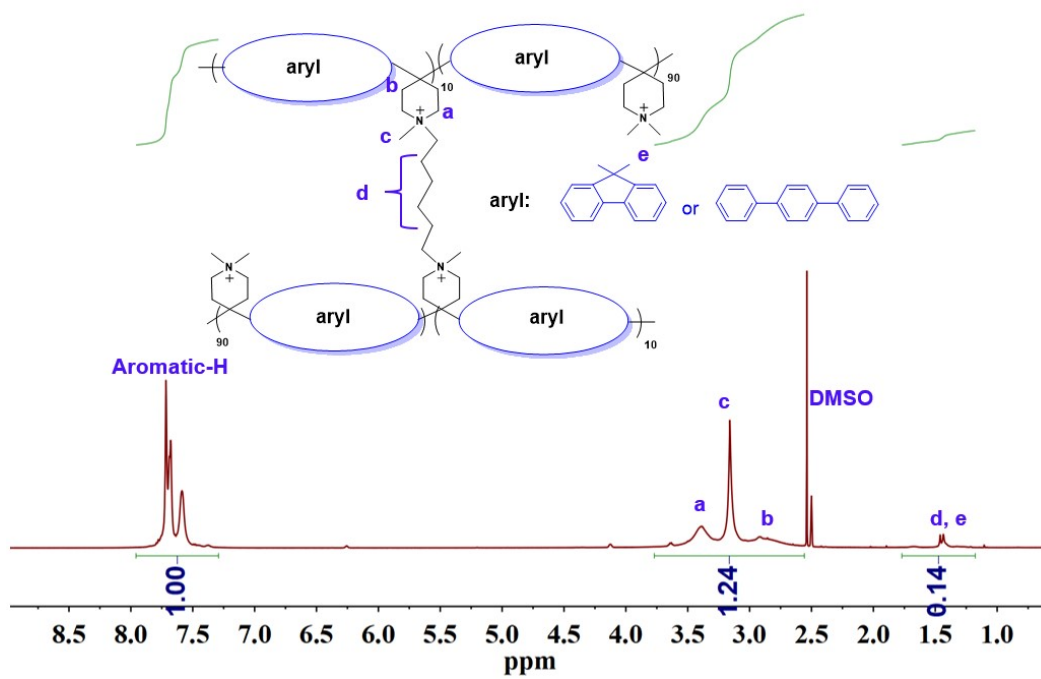

**Figure S3.** <sup>1</sup>H NMR spectrum and chemical structure of x-PFTP-10.

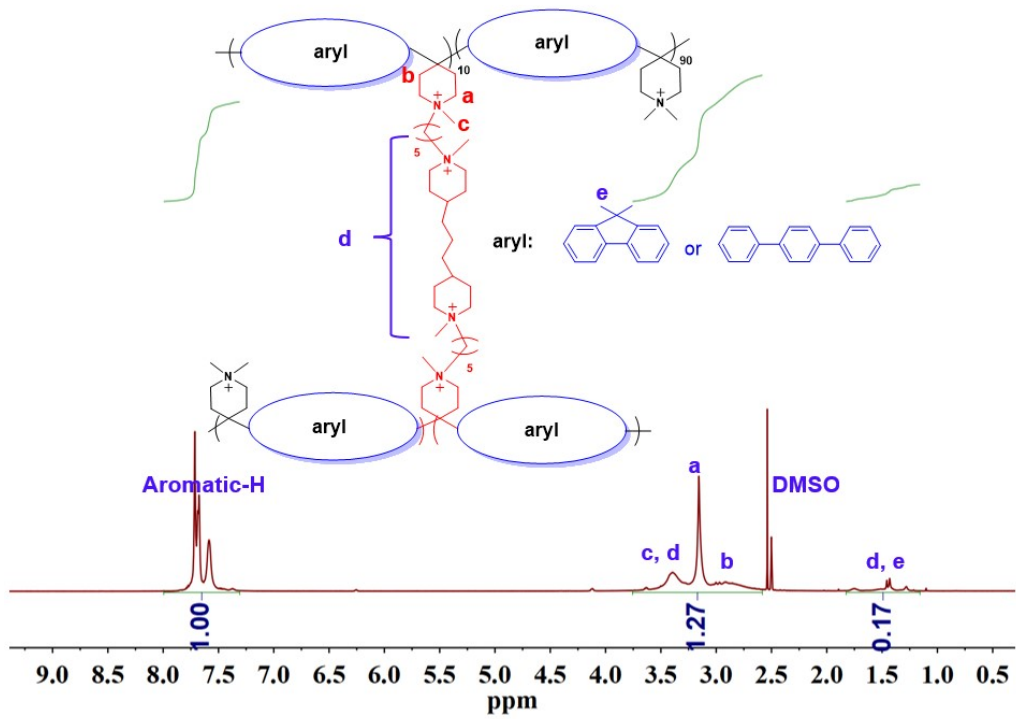

**Figure S4.** <sup>1</sup>H NMR spectrum and chemical structure of x-PFTP-DP-C5-10.

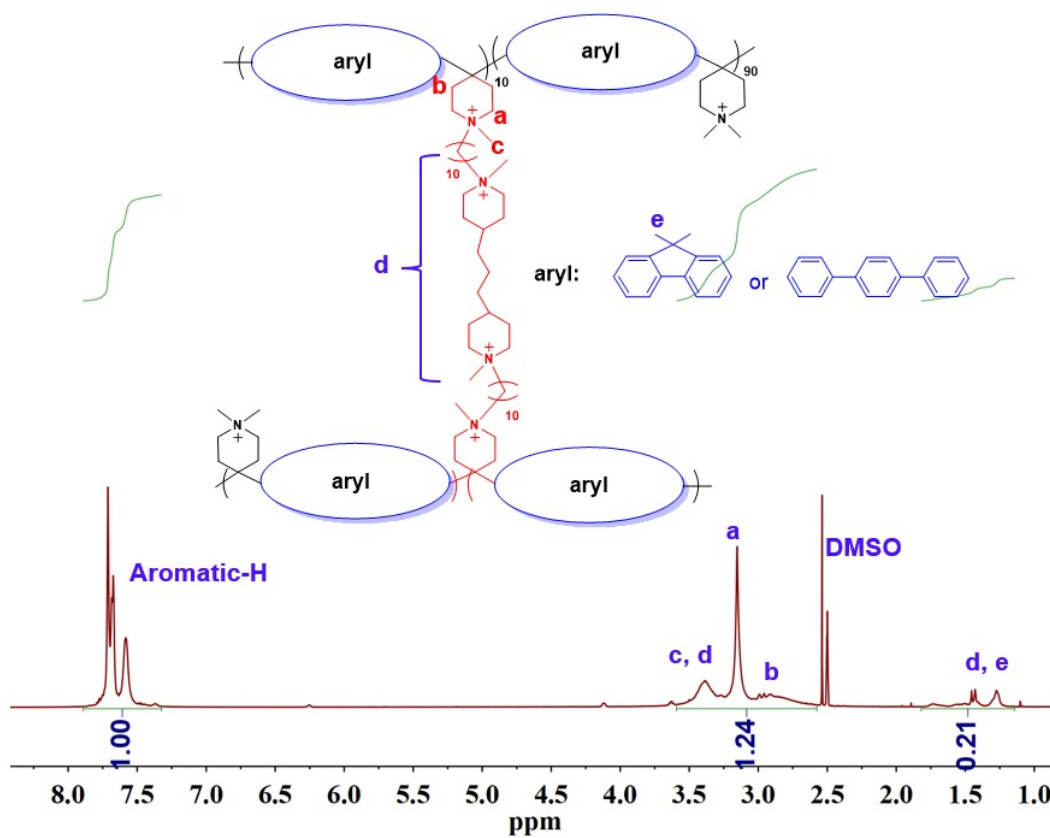

**Figure S5.** <sup>1</sup>H NMR spectrum and chemical structure of x-PFTP-DP-C10-10.

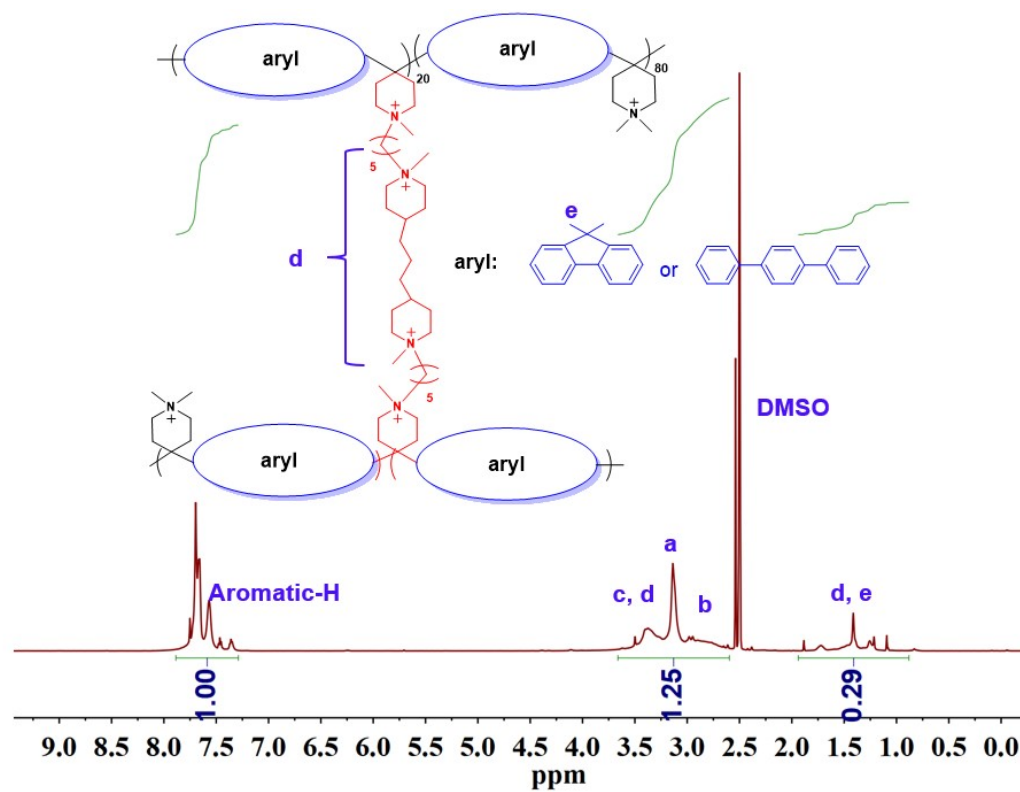

**Figure S6.** <sup>1</sup>H NMR spectrum and chemical structure of x-PFTP-DP-C5-20.

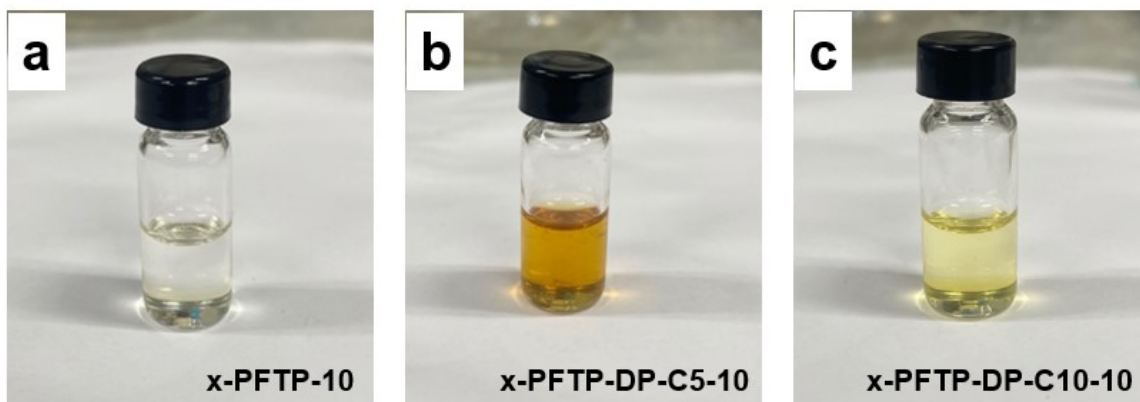

**Figure S7.** The photograph of transparent x-PFTP-10 and x-PFTP-DP-Cn-m polymer solution. a) x-PFTP-10, b) x-PFTP-DP-C5-10, c) x-PFTP-DP-C10-10.



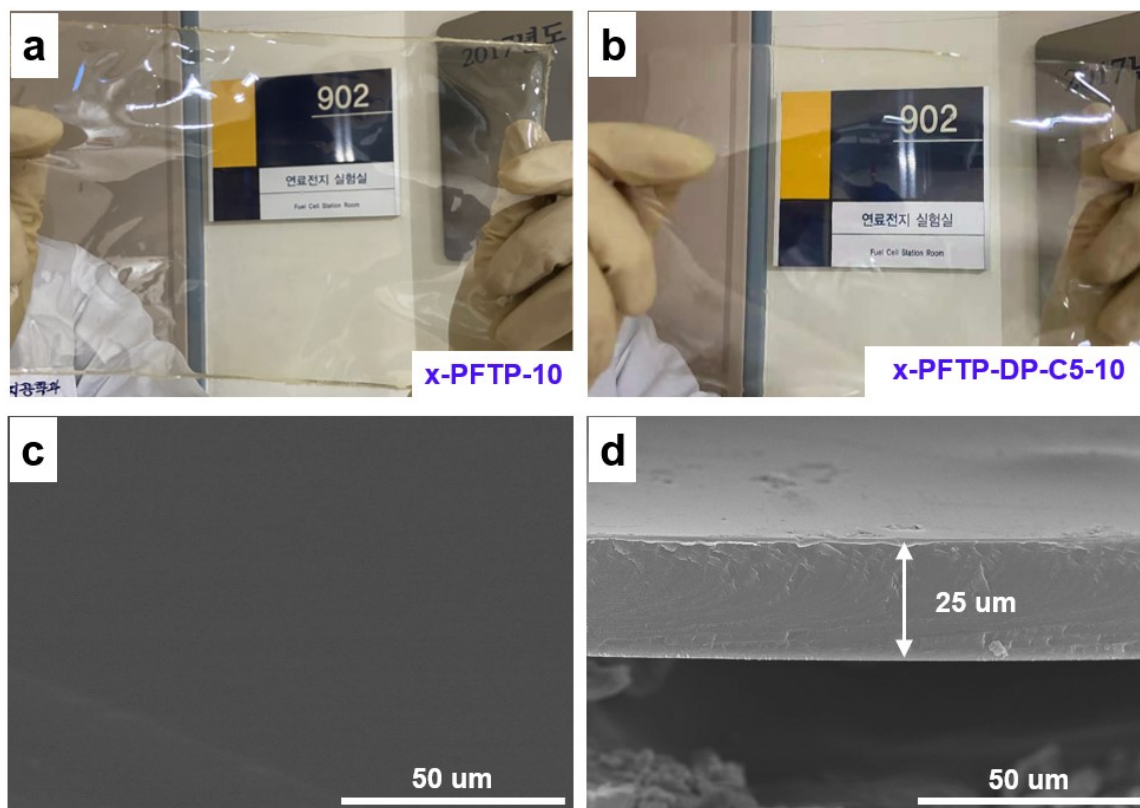

**Figure S8.** The photograph of transparent a) x-PFTP-10, b) x-PFTP-DP-C5-10 AEMs with a thickness of  $\sim 25 \mu\text{m}$ . The SEM image of c) surface, d) cross-section of x-PFTP-DP-C5-10 with  $25 \mu\text{m}$ .

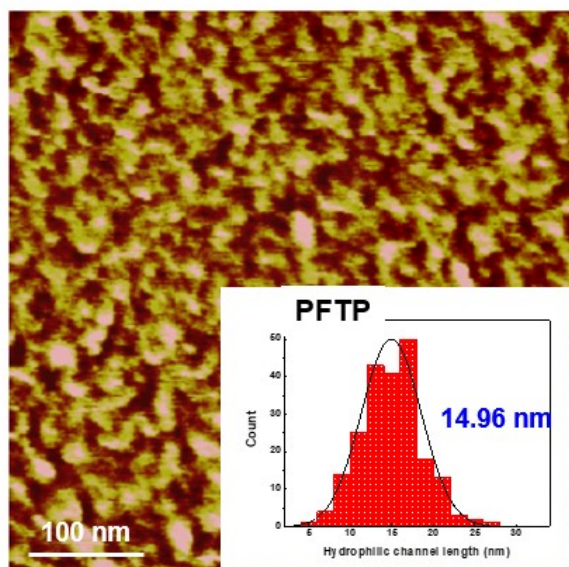

**Figure S9.** AFM images of PFTP in the I' form, along with the hydrophilic phase length.

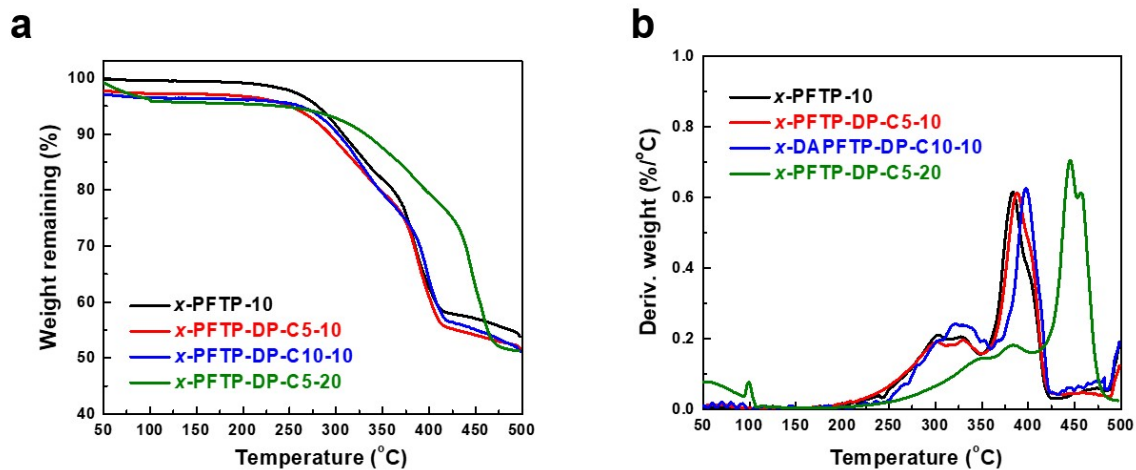

Figure S10. Thermal properties of *x*-PFTP-*m* and *x*-PFTP-DP-*C<sub>n</sub>*-*m* AEMs.

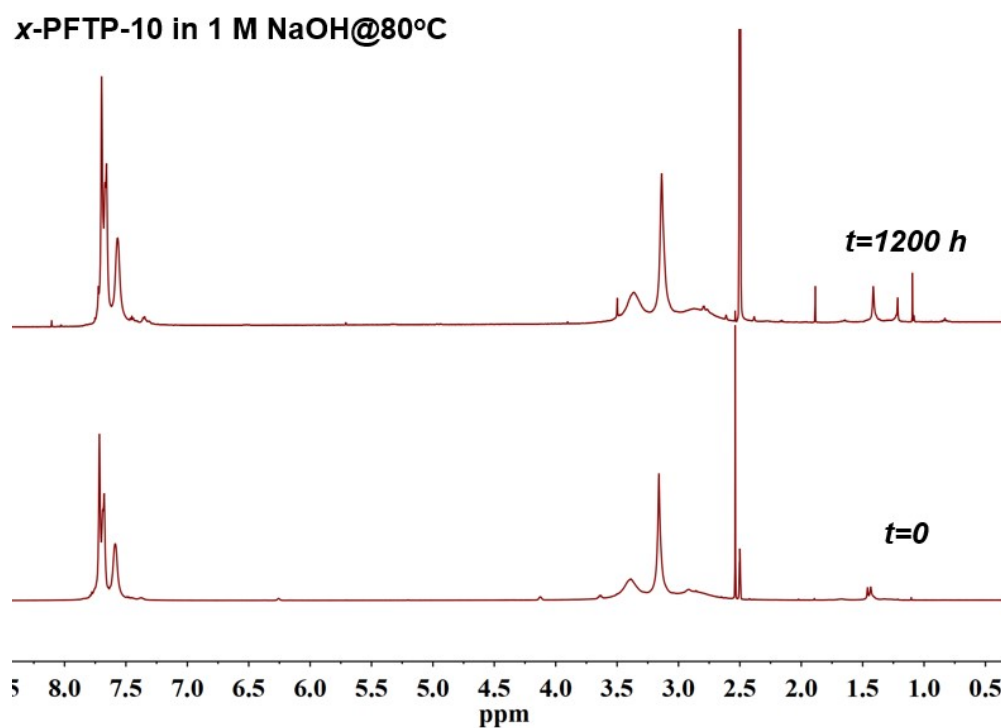

Figure S11. <sup>1</sup>H NMR spectrum of *x*-PFTP-10 before and after 1200 h in 1 M NaOH at 80 °C.

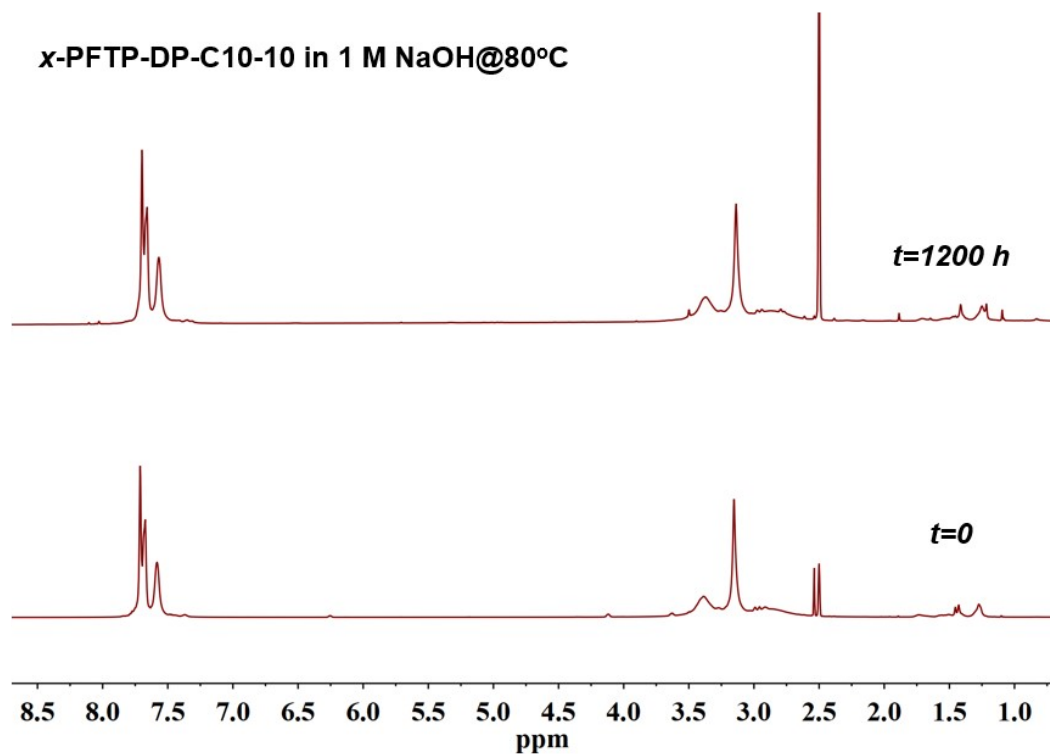

**Figure S12.**  $^1\text{H}$  NMR spectrum of x-PFTP-DP-C10-10 before and after 1200 h in 1 M NaOH at 80 °C.

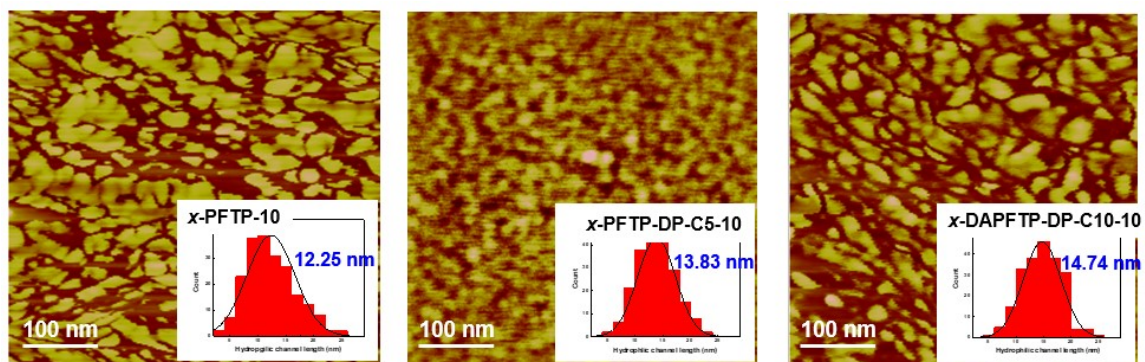

**Figure S13.** AFM images of x-PFTP-10 and x-PFTP-DP-C<sub>n</sub>-m AEMs after 1200 h in 1 M NaOH at 80 °C.

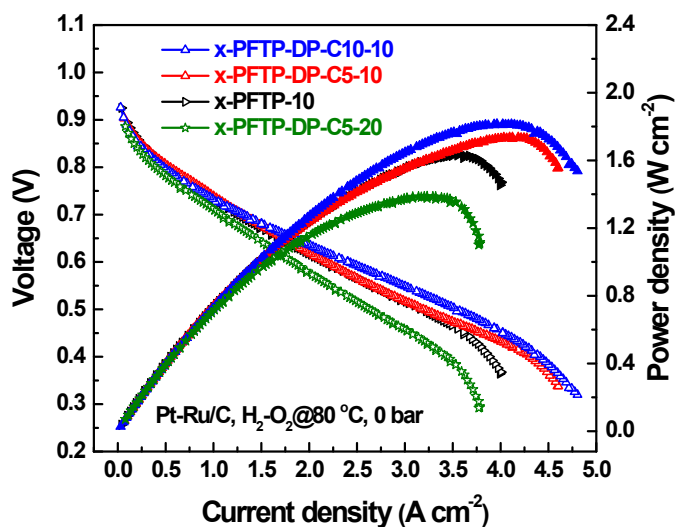

**Figure S14.** AEMFC performance with x-PFTP-m and x-PFTP-DP-Cn-m AEMs ( $22 \pm 3 \mu\text{m}$ ). Testing conditions of A/C PFBP ionomers,  $0.39 \text{ mg cm}^{-2}$  Pt-Ru/C in the anode with extra carbon powder (a ratio of AEIs: total carbon: Pt-Ru = 1:2.33:2),  $0.26 \text{ mg cm}^{-2}$  Pt/C in the cathode (a ratio of AEIs: total carbon: metal = 1:2:1.33),  $80 \text{ }^\circ\text{C}$ , 75%/100% A/C RH,  $1,000/1,000 \text{ mL min}^{-1}$   $\text{H}_2\text{-O}_2$  flow rate, 0/0 bar back pressure.

**Table S1.** The solubility of crosslinked PFTP AEMs in common solvents

|                  | DMSO | DMAc | NMP | DMF | IPA |
|------------------|------|------|-----|-----|-----|
| PFTP             | ++   | ++   | ++  | ++  | –   |
| x-PFTP-10        | ++   | +    | ++  | ++  | –   |
| x-PFTP-DP-C5-10  | ++   | +    | ++  | ++  | –   |
| x-PFTP-DP-C10-10 | ++   | +    | ++  | ++  | –   |
| x-PFTP-DP-C5-20  | +    | +    | +   | +   | –   |
